# Supplementary material for: Aiding Grasp Synthesis for Novel Objects Using Heuristic-Based and Data-Driven Active Vision Methods
Source: Front Robot AI. 2021 Jul 15;8:696587. doi: 10.3389/frobt.2021.696587 (PMC8320375; doi:10.3389/frobt.2021.696587)
Supplement: Supplementary file 2 [file DataSheet2.ZIP]

Archive with 5 entries (4 files):
- NN_Models/
- NN_Models/4layersall300.h5
- NN_Models/4layersall300_mem
- NN_Models/4layersall2_.h5
- NN_Models/4layersall2__mem
